# Supplementary material
Source: MDPI journal article supplement (https://www.mdpi.com/2297-8739/11/5/145)
Supplement: s1 [file s1]

Archive with 2 entries (2 files):
- Supplementary Material S1.pdf
- Supplementary Material S2.pdf
