# Supplementary material
Source: MDPI journal article supplement (https://www.mdpi.com/2297-8739/11/5/145)

## Supplementary Material S1

### MS spectra of identified flavonoids

#### Apigenin

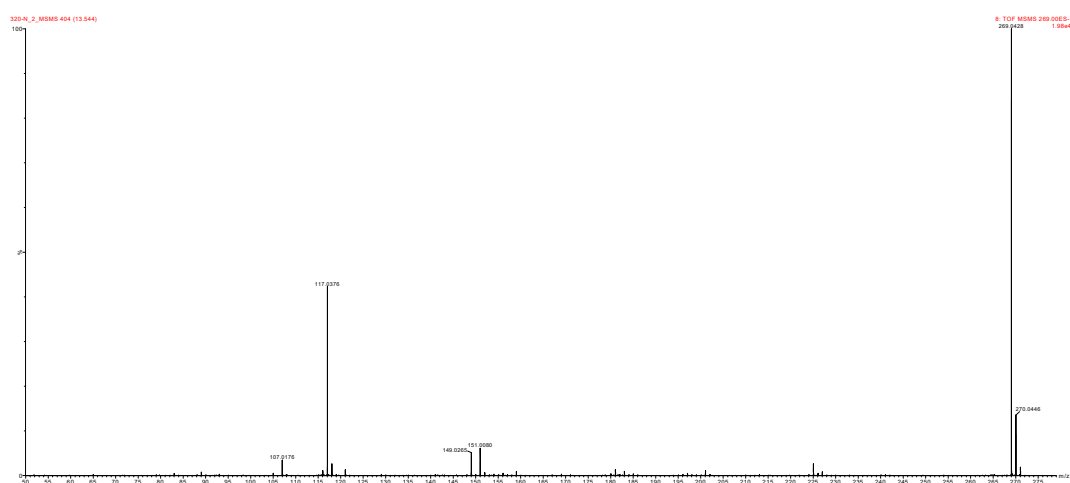

#### Kaempferol

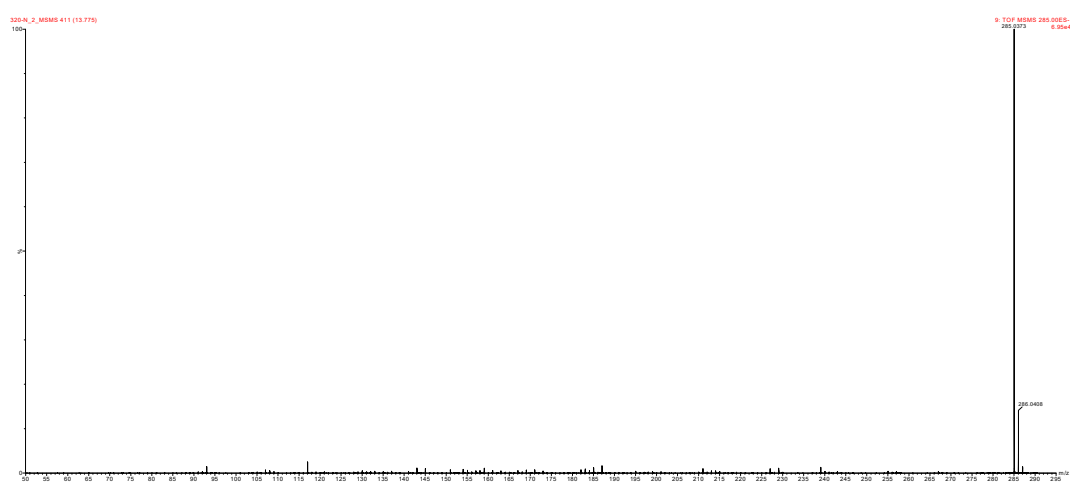

#### Cianidanol

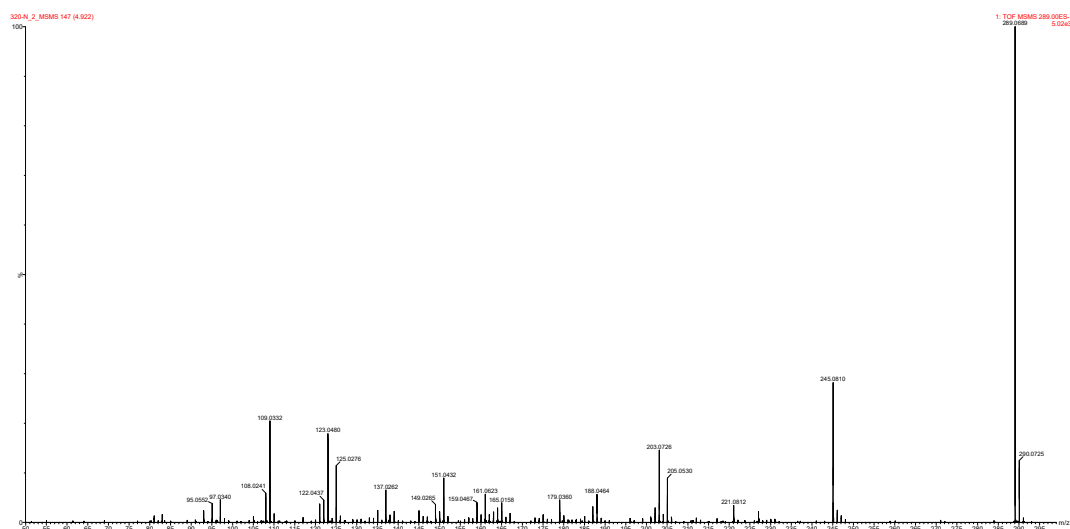

Epicatechin

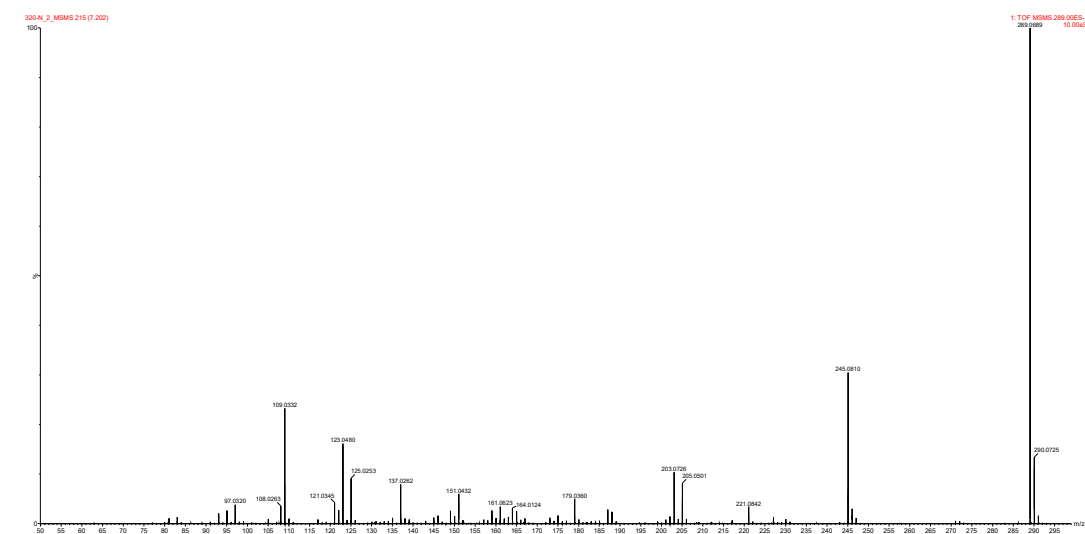

Quercetin

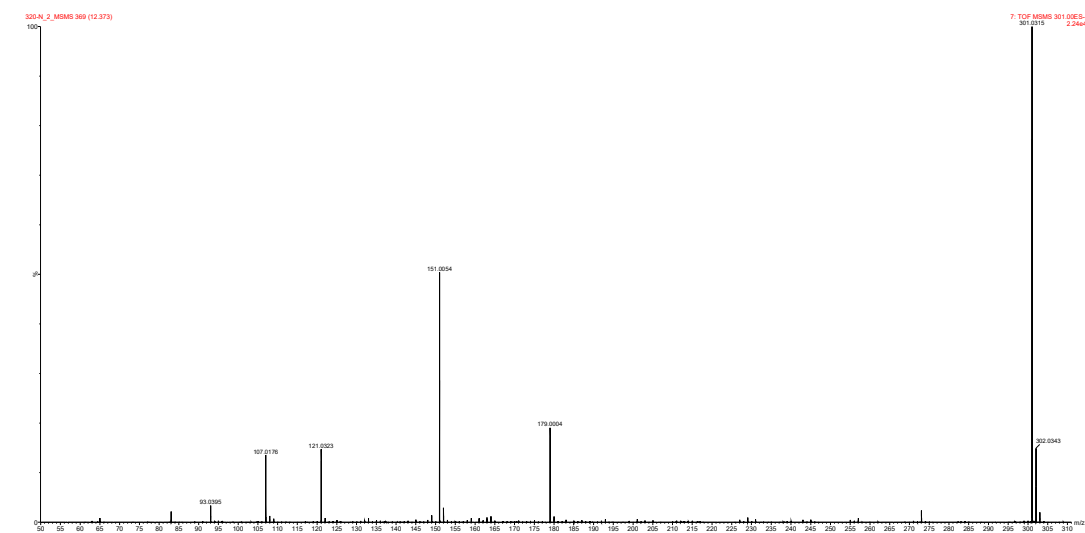

Quercitrin

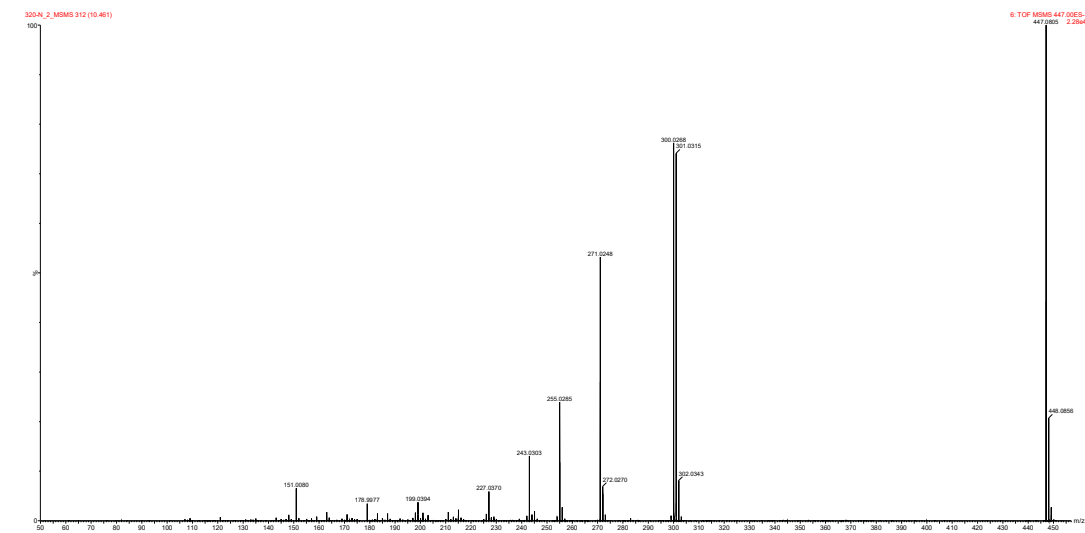

Hyperoside

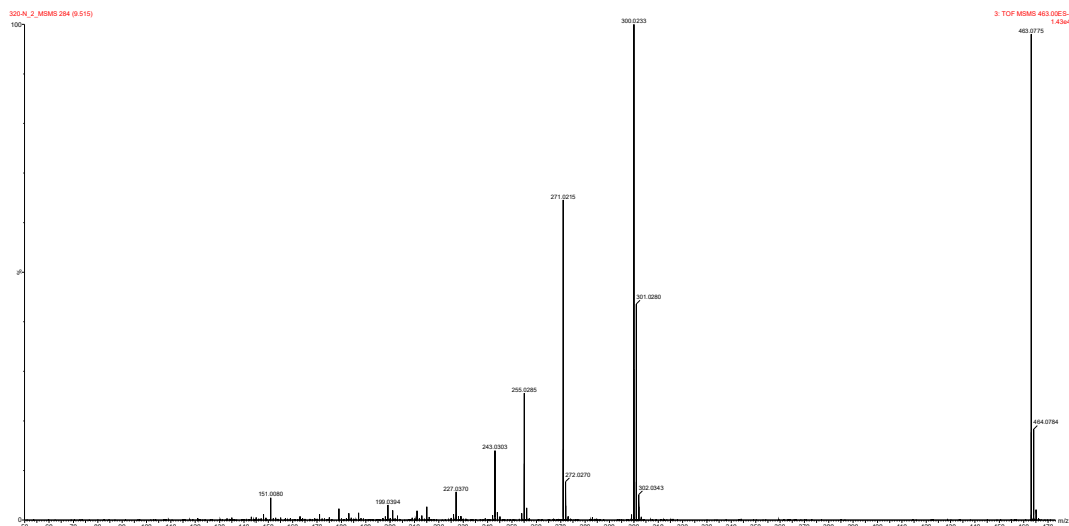

Isoquercitrin

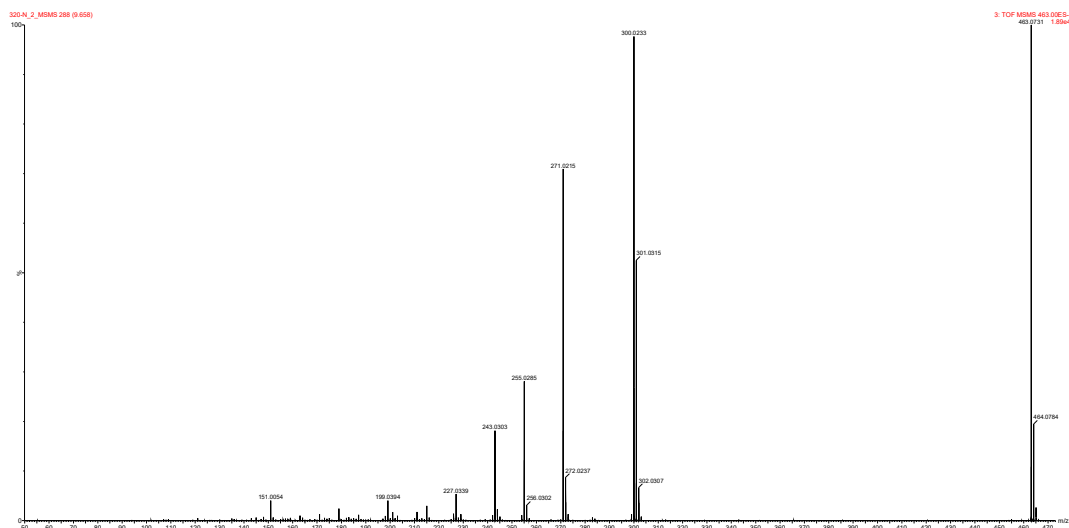

Nicotiflorin

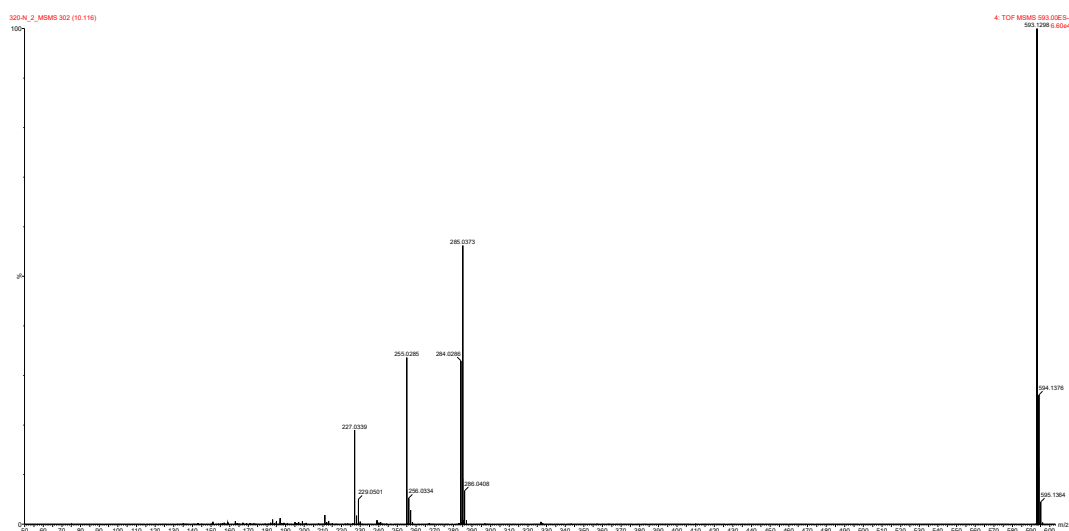

Rutin

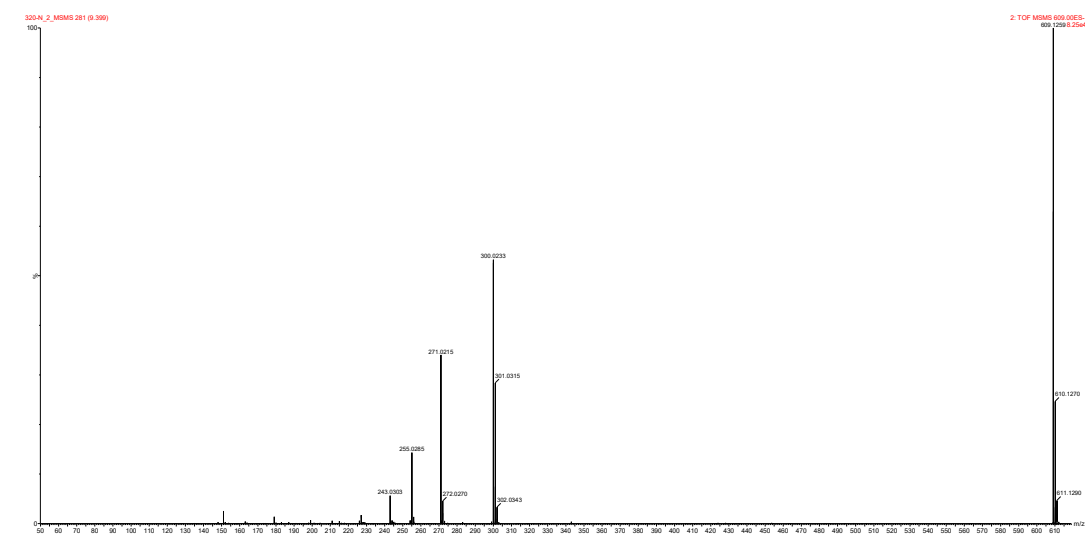

Isorhamnetin

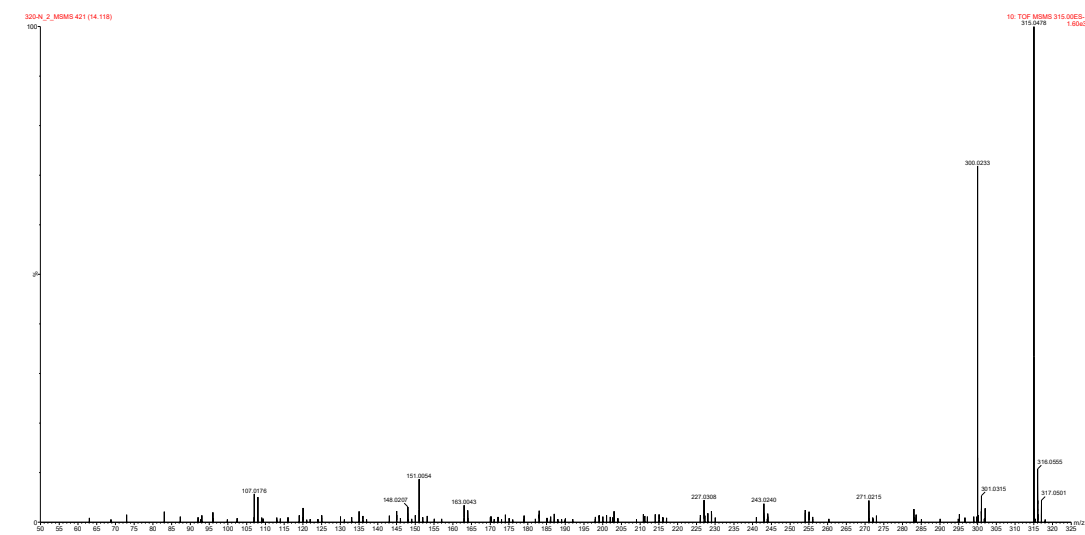

Supplement: s1 [file s1 › Supplementary Material S1.pdf]
