# Supplementary material
Source: MDPI journal article supplement (https://www.mdpi.com/2297-8739/11/5/145)

HPLC chromatograms of flavonoids extracted by different solvents

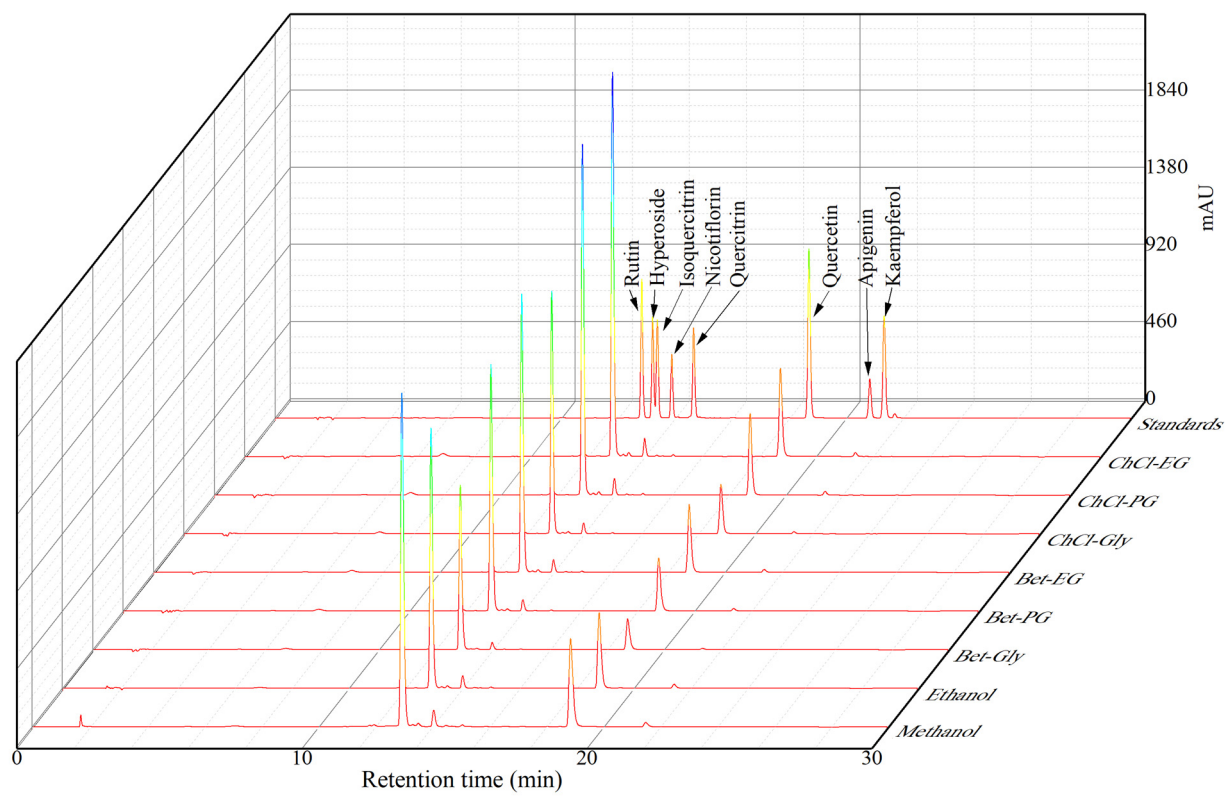

Supplement: s1 [file s1 › Supplementary Material S2.pdf]
